# Supplementary material for: Metallosis after Hip Arthroplasty Damages Skeletal Muscle: A Case Report
Source: MDPI journal article supplement (doi:10.3390/geriatrics8050092), 2023-09-15
Supplement: s1 [file s1]

**Table S1. Clinical characteristics of the control patient.**

| Parameters                | Values |
|---------------------------|--------|
| Age (years)               | 75     |
| BMI (Kg/cm <sup>2</sup> ) | 25.8   |
| T-score (L1–L4)           | -1.1   |
| T-score (femoral neck)    | -0.2   |
| T-score (total femur)     | 1.2    |
| PTH (pg/mL)               | 59.2   |
| 25-(OH)-VitD (ng/mL)      | 18.7   |
| HHS                       | 85     |

BMI: bone mass index; PTH: parathormone; HHS: harris hip score.

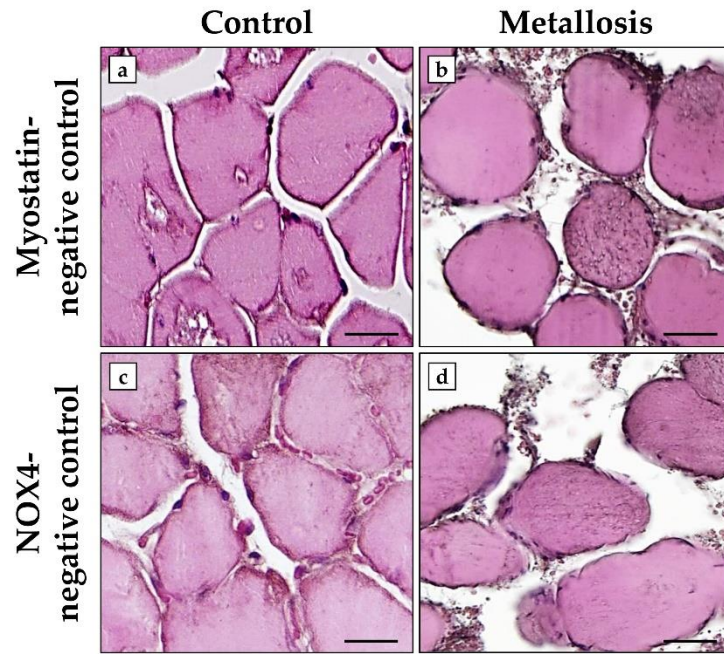

**Figure S1. Immunohistochemical analysis for myostatin and NADPH Oxidase 4 (NOX4) expressions in muscle tissue.** (a) Myostatin-negative control in the control patient. (b) Myostatin-negative control in the metallosis patient. (c) NOX4-negative control in the control patient. (d) NOX4-negative control in the metallosis patient. Images were magnified 20 $\times$ , scale bar represents 100  $\mu$ m.
